# Supplementary material for: Prevalence of Gestational Diabetes in Triplet Pregnancies: A Retrospective Cohort Study and Meta-Analysis
Source: PubMed Central journal article supplement (PMC7290297; doi:10.3390/jcm9051523), 2020-05-18
Supplement: jcm-09-01523-s001.pdf [file jcm-09-01523-s001.pdf]

**Table S1.** Estimates and 95% confidence intervals obtained in a leave-one-out sensitivity analysis of all 38 eligible studies. The calculations are performed as in the main analysis. However, in each round of the sensitivity analysis one study is not included.

|                                    | <b>Estimate Pooled</b> | <b>95% Confidence Interval</b> |
|------------------------------------|------------------------|--------------------------------|
| All studies included               | 0.073                  | 0.050;0.099                    |
| Without Adesiyun & Esegbe[25]      | 0.075                  | 0.051;0.101                    |
| Without Almeida et al.[26]         | 0.072                  | 0.049;0.098                    |
| Without Combs et al.[27]           | 0.071                  | 0.048;0.097                    |
| Without Eddib et al.[28]           | 0.074                  | 0.051;0.101                    |
| Without Elliott et al.[29]         | 0.076                  | 0.053;0.102                    |
| Without Fennessy et al.[30]        | 0.073                  | 0.049;0.099                    |
| Without Fitzsimmons et al.[31]     | 0.071                  | 0.048;0.097                    |
| Without Ghazeeri et al.[23]        | 0.073                  | 0.045;0.099                    |
| Without Guilherme et al.[32]       | 0.073                  | 0.049;0.099                    |
| Without Hager et al.               | 0.067                  | 0.047;0.091                    |
| Without Kawaguchi et al.[33]       | 0.077                  | 0.054;0.103                    |
| Without Lipitz et al.[34]          | 0.074                  | 0.050;0.100                    |
| Without Luke and Brown[22]         | 0.075                  | 0.051;0.101                    |
| Without Machtinger et al.[35]      | 0.073                  | 0.050;0.100                    |
| Without Macones et al.[36]         | 0.075                  | 0.051;0.101                    |
| Without Makhseed et al.[37]        | 0.072                  | 0.049;0.098                    |
| Without Malone et al.[38]          | 0.073                  | 0.050;0.100                    |
| Without Manzur et al.[39]          | 0.072                  | 0.049;0.099                    |
| Without Marino et al.[24]          | 0.074                  | 0.050;0.100                    |
| Without Okyay et al.[40]           | 0.072                  | 0.049;0.098                    |
| Without Pakrashi and Defranco[41]  | 0.070                  | 0.048;0.096                    |
| Without Parkinson et al.[42]       | 0.073                  | 0.050;0.099                    |
| Without Peress et a.[43]           | 0.074                  | 0.050;0.101                    |
| Without Razaz et al.[44]           | 0.070                  | 0.048;0.096                    |
| Without Revello et al.[45]         | 0.070                  | 0.048;0.096                    |
| Without Salihu et al.[46]          | 0.075                  | 0.051;0.102                    |
| Without Santema et al.[47]         | 0.074                  | 0.051;0.101                    |
| Without Sato et al.[48]            | 0.076                  | 0.054;0.102                    |
| Without Seoud et al.[49]           | 0.070                  | 0.048;0.094                    |
| Without Simoes et al.[50]          | 0.075                  | 0.051;0.101                    |
| Without Sivan et al.[9]            | 0.069                  | 0.047;0.094                    |
| Without Sklar et al.[51]           | 0.071                  | 0.048;0.097                    |
| Without Skrablin et al.[52]        | 0.076                  | 0.053;0.102                    |
| Without Smith et al.[53]           | 0.073                  | 0.050;0.100                    |
| Without Smith-Levitinet et al.[54] | 0.072                  | 0.049;0.098                    |
| Without Sumners et al.[55]         | 0.073                  | 0.049;0.100                    |
| Without Weissman and Drugan[56]    | 0.072                  | 0.049;0.098                    |
| Without Ziadeh et al.[57]          | 0.0749                 | 0.052;0.101                    |

**Table S2.** Estimates and 95% confidence intervals obtained in a leave-one-out sensitivity analysis of all 11 studies with a sound GDM definition. The calculations are performed as in the main analysis. However, in each round of the sensitivity analysis one study is not included.

|                             | <b>Estimate Pooled</b> | <b>95% Confidence Interval</b> |
|-----------------------------|------------------------|--------------------------------|
| All studies included        | 0.073                  | 0.050;0.099                    |
| Without Fennessy et al.[30] | 0.128                  | 0.067;0.203                    |
| Without Hager et al.        | 0.107                  | 0.060;0.165                    |
| Without Lipitz et al.[34]   | 0.131                  | 0.070;0.206                    |
| Without Malone et al.[38]   | 0.131                  | 0.070;0.205                    |
| Without Okyay et al.[40]    | 0.124                  | 0.064;0.198                    |

|                                 |       |             |
|---------------------------------|-------|-------------|
| Without Revello et al.[45]      | 0.120 | 0.061;0.194 |
| Without Seoud et al.[49]        | 0.112 | 0.061;0.174 |
| Without Simoes et al.[50]       | 0.136 | 0.076;0.208 |
| Without Sivan et al.[9]         | 0.115 | 0.060;0.184 |
| Without Skrablin et al.[52]     | 0.141 | 0.088;0.204 |
| Without Weissman and Drugan[56] | 0.124 | 0.065;0.198 |

GDM, gestational diabetes mellitus.
